# Supplementary material for: Individualizing Follow-Up Strategies in High-Grade Soft Tissue Sarcoma with Flexible Parametric Competing Risk Regression Models
Source: PubMed Central journal article supplement (PMC7017264; doi:10.3390/cancers12010047), 2019-12-21
Supplement: cancers-12-00047-s001.pdf [file cancers-12-00047-s001.pdf]

## Supplementary Material

Article

### Individualising follow-up strategies in high-grade soft tissue sarcoma with flexible parametric competing risk regression models.

**Table S1.** Conditional Risks for Local Recurrence – Threshold 4%.

| Interval (months)                                                                                              | 0-3 | 3-6 | 6-9 | 9-12 | 12-15 | 15-18 | 18-21 | 21-24 | 24-27 | 27-30 | 30-33 | 33-36 | 36-42 | 42-48 | 48-54 | 54-60 |
|----------------------------------------------------------------------------------------------------------------|-----|-----|-----|------|-------|-------|-------|-------|-------|-------|-------|-------|-------|-------|-------|-------|
| <b>Clinical Example I</b><br>UPS, G3, 12cm, male, R0, neoadj. RTX, no adj. RTX, no adj. CTX                    | 0.3 | 0.8 | 0.8 | 0.7  | 0.5   | 0.3   | 0.3   | 0.3   | 0.3   | 0.2   | 0.2   | 0.2   | 0.3   | 0.3   | 0.2   | 0.2   |
|                                                                                                                | 1.1 |     | 1.5 |      | 0.9   |       | 0.6   |       | 0.5   |       | 0.4   |       | 0.6   |       | 0.4   |       |
| <b>Clinical Example II</b><br>Myxofibrosarcoma, G3, 8cm, female, R1/2, neoadj. RTX, no adj. RTX, no adj. CTX   | 0.7 | 1.7 | 1.7 | 1.4  | 1.1   | 0.9   | 0.7   | 0.6   | 0.5   | 0.5   | 0.4   | 0.8   | 0.7   | 0.5   | 0.5   | 0.4   |
|                                                                                                                | 2.4 |     | 3.1 |      | 2.0   |       | 1.4   |       | 1.0   |       | 1.0   |       | 1.2   |       | 1.0   |       |
| <b>Clinical Example III</b><br>Synovial sarcoma, G3, 6cm, female, R0, no neoadj. RTX, no adj. RTX, no adj. CTX | 0.7 | 1.5 | 1.5 | 1.2  | 1.0   | 0.8   | 0.7   | 1.2   | 0.5   | 0.4   | 0.4   | 0.3   | 0.6   | 0.5   | 0.5   | 0.4   |
|                                                                                                                | 2.2 |     | 2.8 |      | 1.8   |       | 1.0   |       | 0.9   |       | 0.7   |       | 1.1   |       | 0.8   |       |
| <b>Clinical Example IV</b><br>Leiomyosarcoma, G2, 4cm, male, R0, no neoadj. RTX, no adj. RTX, no adj. CTX      | 0.1 | 2.0 | 2.1 | 1.8  | 1.5   | 1.2   | 1.0   | 0.9   | 0.8   | 0.7   | 0.6   | 0.6   | 1.0   | 0.8   | 0.7   | 0.7   |
|                                                                                                                | 2.8 |     | 3.9 |      | 2.6   |       | 1.9   |       | 1.4   |       | 1.2   |       | 1.8   |       | 1.4   |       |
| <b>Clinical Example V</b>                                                                                      | 0.2 | 0.5 | 0.5 | 0.4  | 0.4   | 0.3   | 0.2   | 0.2   | 0.2   | 0.2   | 0.2   | 0.1   | 0.2   | 0.2   | 0.2   | 0.2   |
|                                                                                                                | 0.7 |     | 1.0 |      | 0.7   |       | 0.5   |       | 0.4   |       | 0.3   |       | 0.4   |       | 0.3   |       |

Myxoid liposarcoma, G2, 3cm, female, R0, no neoadj. RTX, no adj. RTX, no adj. CTX

|                                                                                     |      |     |      |     |      |     |     |     |     |      |      |      |     |     |      |      |
|-------------------------------------------------------------------------------------|------|-----|------|-----|------|-----|-----|-----|-----|------|------|------|-----|-----|------|------|
| <b>Clinical Example VI</b>                                                          | 1.5  | 3.5 | 3.5  | 2.9 | 2.3  | 1.8 | 1.5 | 1.3 | 1.1 | 1.0  | 0.9  | 0.8  | 1.3 | 1.1 | 1.0  | 0.9  |
| Dediff. Liposarcoma, G3, 9cm, male, R1/2, no neoadj. RTX, no adj. RTX, no adj. CTX  | 4.9  |     | 6.3  |     | 4.1  |     | 2.8 |     | 2.1 |      | 1.6  |      | 2.5 |     | 1.8  |      |
| <b>Clinical Example VII</b>                                                         | 0.5  | 1.2 | 1.3  | 1.1 | 0.9  | 0.7 | 0.6 | 0.5 | 0.5 | 0.4  | 0.4  | 0.3  | 0.6 | 0.5 | 0.4  | 0.4  |
| Leiomyosarcoma, G2, 6cm, female, R1/2, neoadj. RTX, no adj. RTX, no adj. CTX        | 1.7  |     | 2.4  |     | 1.6  |     | 1.1 |     | 0.9 |      | 0.7  |      | 1.1 |     | 0.9  |      |
| <b>Clinical Example VIII</b>                                                        | 0.9  | 2.1 | 2.2  | 1.8 | 1.4  | 1.1 | 0.9 | 0.8 | 0.7 | 0.6  | 0.5  | 0.5  | 0.8 | 0.7 | 0.6  | 0.5  |
| Synovial sarcoma, G3, 6cm, male, R0, no neoadj. RTX, no adj. RTX, no adj. CTX       | 3.1  |     | 3.9  |     | 2.5  |     | 1.7 |     | 1.3 |      | 1.0  |      | 1.5 |     | 1.1  |      |
| <b>Clinical Example IX</b>                                                          | 4.0  | 9.4 | 9.9  | 8.4 | 6.8  | 5.7 | 4.8 | 4.1 | 3.6 | 3.3  | 2.9  | 2.7  | 4.6 | 4.0 | 3.5  | 3.2  |
| Myxofibrosarcoma, G2, 10cm, male, R1/2, no neoadj. RTX, no adj. RTX, no adj. CTX    | 12.9 |     | 17.4 |     | 12.1 |     | 8.7 |     | 6.8 |      | 5.5  |      | 8.4 |     | 6.6  |      |
| <b>Clinical Example X</b>                                                           | 0.1  | 0.1 | 0.2  | 0.1 | 0.1  | 0.1 | 0.1 | 0.1 | 0.1 | 0.04 | 0.04 | 0.04 | 0.1 | 0.1 | 0.04 | 0.04 |
| Myxoid liposarcoma, G3, 12cm, female, R0, neoadjuvant RTX, no adj. RTX, no adj. CTX | 0.2  |     | 0.3  |     | 0.2  |     | 0.1 |     | 0.1 |      | 0.1  |      | 0.1 |     | 0.1  |      |

**Legend:** Conditional risks for local recurrence according to the currently applied follow-up program for ten different clinical examples using the test cohort. Shaded areas highlight follow-up intervals exceeding the threshold of 4% for local recurrence. The first row for each example depicts conditional risks at every 3 months, whilst in the second row, the predicted conditional risks in 6-month-intervals are shown.

**Table S2.** Conditional Risks for Distant Metastasis – Threshold 2%.

| Interval (months)                                                                      | 0-3  | 3-6  | 6-9  | 9-12 | 12-15 | 15-18 | 18-21 | 21-24 | 24-27 | 27-30 | 30-33 | 33-36 | 36-42 | 42-48 | 48-54 | 54-60 |
|----------------------------------------------------------------------------------------|------|------|------|------|-------|-------|-------|-------|-------|-------|-------|-------|-------|-------|-------|-------|
| <b>Clinical Example I</b><br>UPS, G3, 12cm, male, R0, neoadj. RTX                      | 5.8  | 11.2 | 7.4  | 7.5  | 7.2   | 5.9   | 4.6   | 3.6   | 2.9   | 2.4   | 2.0   | 1.7   | 2.6   | 1.9   | 1.5   | 1.1   |
|                                                                                        | 17.8 |      | 14.3 |      | 12.7  |       | 7.8   |       | 5.2   |       | 3.6   |       | 4.5   |       | 2.6   |       |
| <b>Clinical Example II</b><br>Myxofibrosarcoma, G3, 8cm, female, R1/2, neoadj. RTX     | 3.2  | 6.3  | 4.1  | 4.3  | 4.0   | 3.3   | 2.5   | 2.0   | 1.6   | 1.3   | 1.1   | 1.9   | 1.4   | 1.0   | 0.8   | 0.6   |
|                                                                                        | 9.3  |      | 8.1  |      | 7.1   |       | 4.5   |       | 2.9   |       | 2.0   |       | 2.5   |       | 1.4   |       |
| <b>Clinical Example III</b><br>Synovial sarcoma, G3, 6cm, female, R0, no neoadj. RTX   | 2.9  | 5.7  | 3.7  | 3.7  | 3.6   | 2.9   | 2.3   | 1.8   | 1.4   | 1.2   | 1.0   | 0.8   | 1.3   | 0.9   | 0.7   | 0.6   |
|                                                                                        | 8.4  |      | 7.3  |      | 6.4   |       | 4.0   |       | 2.6   |       | 1.8   |       | 2.2   |       | 1.3   |       |
| <b>Clinical Example IV</b><br>Leiomyosarcoma, G2, 4cm, male, R0, no neoadj. RTX        | 1.4  | 3.7  | 3.1  | 3.4  | 3.5   | 3.2   | 2.7   | 2.4   | 2.1   | 1.9   | 1.7   | 1.5   | 2.7   | 2.3   | 2.0   | 1.8   |
|                                                                                        | 5.1  |      | 6.4  |      | 6.6   |       | 5.0   |       | 3.9   |       | 3.2   |       | 4.9   |       | 3.8   |       |
| <b>Clinical Example V</b><br>Myxoid liposarcoma, G2, 3cm, female, R0, no neoadj. RTX   | 0.4  | 0.9  | 0.8  | 0.9  | 0.9   | 0.8   | 0.7   | 0.6   | 0.5   | 0.5   | 0.4   | 0.4   | 0.7   | 0.6   | 0.5   | 0.5   |
|                                                                                        | 1.3  |      | 1.6  |      | 1.7   |       | 1.3   |       | 1.0   |       | 0.8   |       | 1.3   |       | 1.0   |       |
| <b>Clinical Example VI</b><br>Dediff. Liposarcoma, G3, 9cm, male, R1/2, no neoadj. RTX | 4.0  | 7.8  | 5.1  | 5.2  | 5.0   | 4.1   | 3.1   | 2.5   | 2.0   | 1.6   | 1.4   | 2.5   | 1.8   | 1.3   | 1.0   | 0.8   |
|                                                                                        | 11.5 |      | 10.0 |      | 8.8   |       | 5.5   |       | 3.6   |       | 2.9   |       | 3.1   |       | 1.6   |       |
| <b>Clinical Example VII</b><br>Leiomyosarcoma, G2, 6cm, female, R1/2, neoadj. RTX      | 2.1  | 5.5  | 4.6  | 5.1  | 5.2   | 4.7   | 4.1   | 3.5   | 3.1   | 2.8   | 2.5   | 2.3   | 4.0   | 3.4   | 3.0   | 2.7   |
|                                                                                        | 7.5  |      | 9.4  |      | 9.7   |       | 7.5   |       | 5.8   |       | 4.8   |       | 7.3   |       | 5.6   |       |
| <b>Clinical Example VIII</b><br>Synovial sarcoma, G3, 6cm, male, R0, no neoadj. RTX    | 4.0  | 7.8  | 5.1  | 5.2  | 5.0   | 4.1   | 3.1   | 2.5   | 2.0   | 1.6   | 1.4   | 1.1   | 1.8   | 1.3   | 1.0   | 0.7   |
|                                                                                        | 11.5 |      | 9.8  |      | 8.8   |       | 5.5   |       | 3.6   |       | 2.5   |       | 3.1   |       | 1.8   |       |
| <b>Clinical Example IX</b><br>Myxofibrosarcoma, G2, 10cm, male, R1/2, no neoadj. RTX   | 1.1  | 3.0  | 2.5  | 2.7  | 2.8   | 2.5   | 2.2   | 1.9   | 1.7   | 1.5   | 1.4   | 1.2   | 2.1   | 1.8   | 1.6   | 1.4   |
|                                                                                        | 4.1  |      | 5.1  |      | 5.3   |       | 4.0   |       | 3.2   |       | 2.6   |       | 3.9   |       | 3.0   |       |

|                                                           |     |     |     |     |     |     |     |     |     |     |     |     |     |     |     |     |
|-----------------------------------------------------------|-----|-----|-----|-----|-----|-----|-----|-----|-----|-----|-----|-----|-----|-----|-----|-----|
| <b>Clinical Example X</b>                                 | 3.0 | 5.8 | 3.7 | 3.8 | 3.7 | 3.0 | 2.3 | 1.8 | 1.5 | 1.2 | 1.0 | 0.8 | 1.3 | 1.0 | 0.7 | 0.6 |
| Myxoid liposarcoma, G3, 12cm, female, R0, neoadjuvant RTX | 8.5 |     | 7.4 |     | 6.5 |     | 4.1 |     | 2.6 |     | 1.8 |     | 2.3 |     | 1.3 |     |

**Legend:** Conditional risks for distant metastasis according to the currently applied follow-up program for ten different clinical examples using the test cohort. Shaded areas highlight follow-up intervals exceeding the threshold of 2% for distant metastasis. The first row for each example depicts conditional risks at every 3 months, whilst in the second row, the predicted conditional risks in 6-month-intervals are shown.
